# Supplementary material for: Photoswitchable aggregation-induced emission polymer containing dithienylethene and tetraphenylethene moieties
Source: Royal Society of Chemistry journal article supplement (doi:10.1039/c5ra27014f), 2016-01-01
Supplement: c5ra27014f1.pdf [file c5ra27014f1.pdf]

## Supporting Information

### **Photoswitchable aggregation-induced emission polymer containing dithienylethene and tetraphenylethene moieties**

Garry Sinawang, Jilei Wang, Bing Wu, Xiaogong Wang, Yaning He\*

Department of Chemical Engineering, Key Laboratory of Advanced Materials (MOE), Tsinghua  
University, Beijing, 100084, P. R. China

\*Corresponding author: [heyanning@mail.tsinghua.edu.cn](mailto:heyanning@mail.tsinghua.edu.cn)

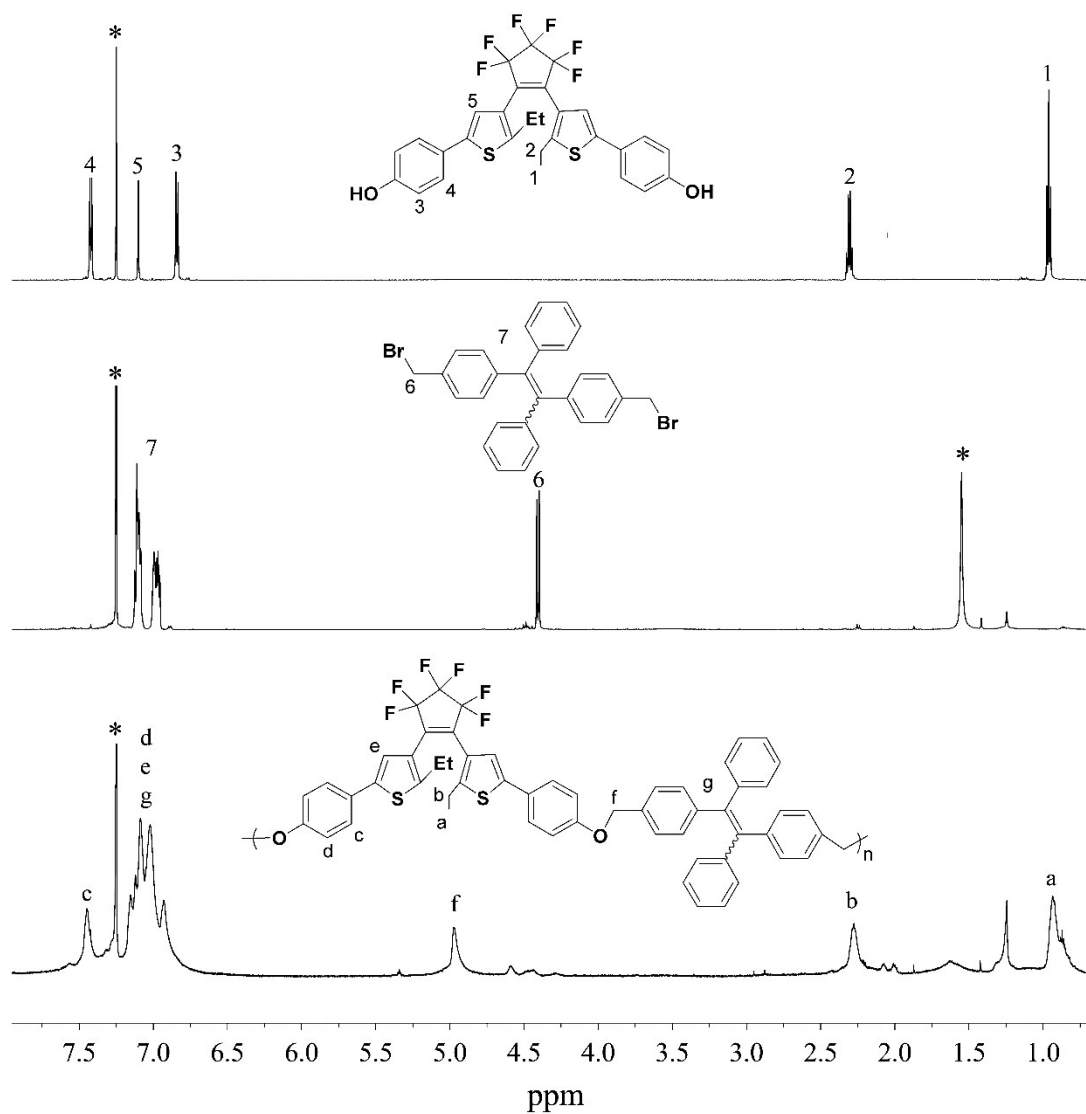

Fig. S1  $^1\text{H}$  NMR spectra of the monomers and prepared polymer in  $\text{CDCl}_3$

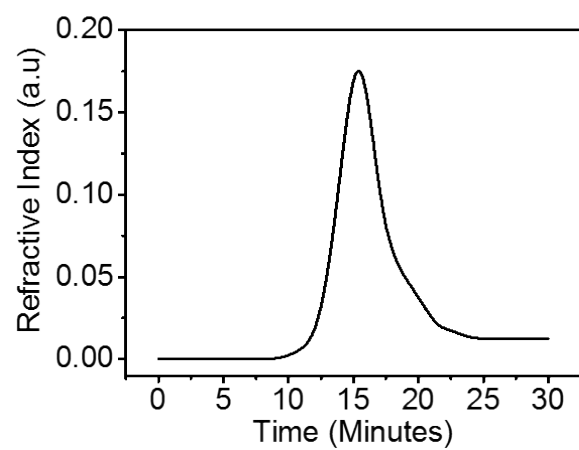

Fig. S2 GPC trace of prepared AIE active polymer (PDI=2.2,  $M_n$ =9000)

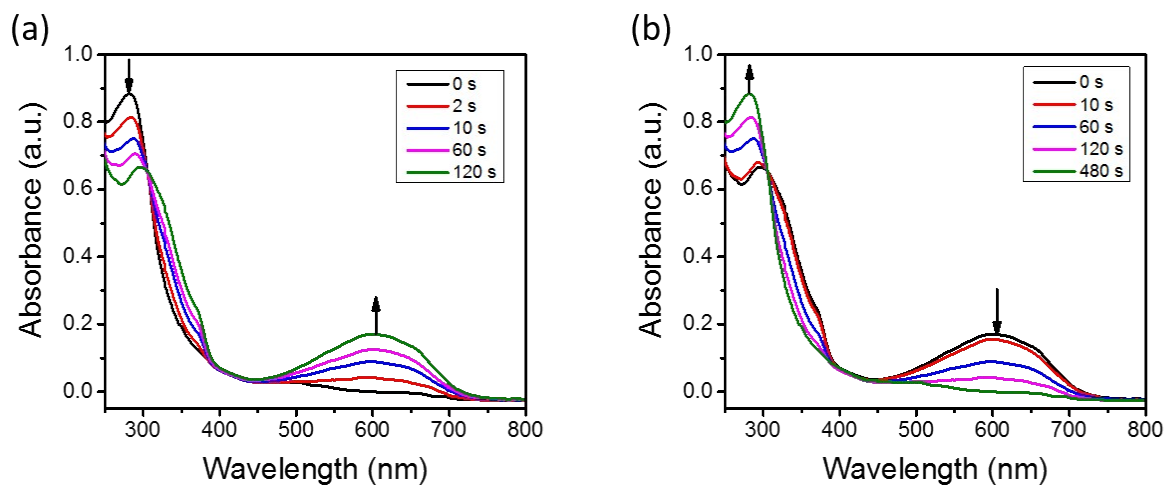

Fig. S3 UV-Vis spectra of AIE polymer in  $\text{CHCl}_3$  (a) DTE in open form upon irradiation with 300 nm UV light, (b) DTE in closed form upon irradiation with 620 nm visible light.

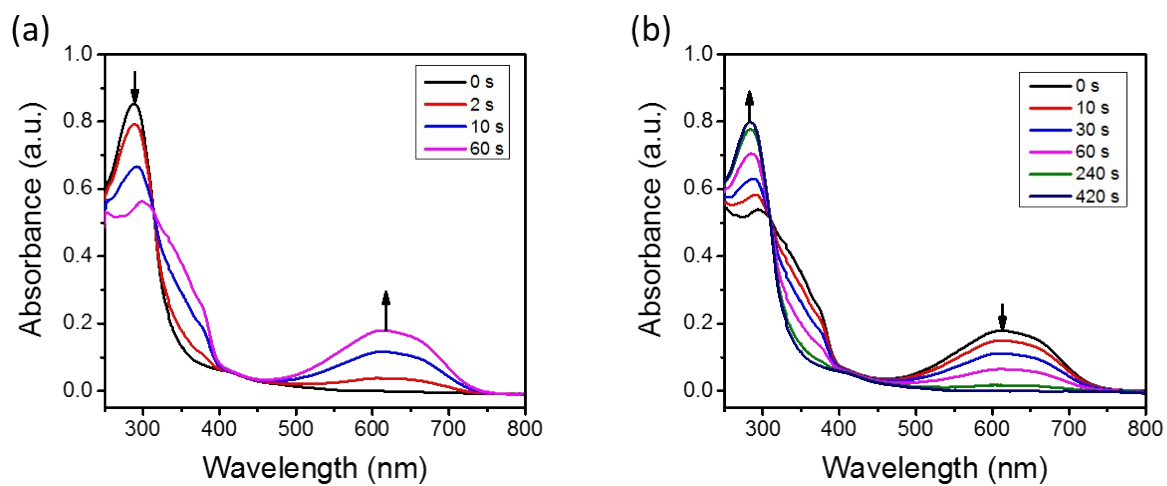

Fig. S4 UV-Vis spectra of AIE polymer in DMF (a) DTE in open form upon irradiation with 300 nm UV light, (b) DTE in closed form upon irradiation with 620 nm visible light.

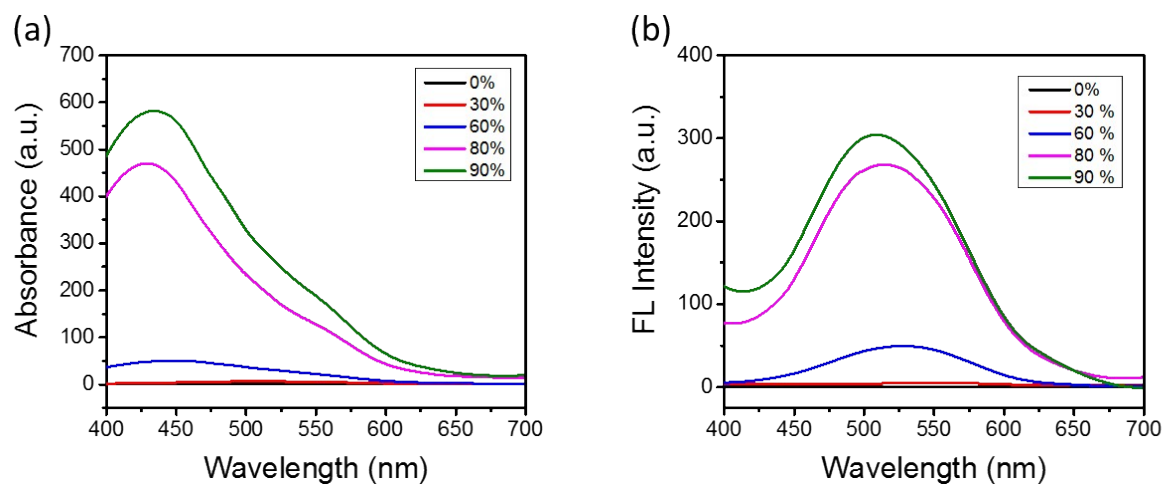

Fig. S5 Fluorescence spectra of the AIE polymer in (a)  $\text{CHCl}_3$ –hexane mixtures, (b) DMF–water mixtures (excitation at 380 nm).
